**Original Article**

**Manipulating Histone Acetylation Leads to Adverse Effects in Hemangiosarcoma Cells**

Tamami Suzuki <sup>a</sup>, Keisuke Aoshima <sup>a,\*</sup>, Jumpei Yamazaki <sup>b</sup>, Atsushi Kobayashi <sup>a</sup>, Takashi Kimura <sup>a</sup>

<sup>a</sup> *Laboratory of Comparative Pathology, Department of Clinical Sciences, Faculty of Veterinary Medicine, Hokkaido University, Sapporo, Hokkaido, 060-0818, Japan*

<sup>b</sup> *Translational Research Unit, Veterinary Teaching Hospital, Faculty of Veterinary Medicine, Hokkaido University, Sapporo, Hokkaido, 060-0818, Japan*

\* Corresponding author. Tel.: +81 11 7065193.

E-mail address: k-aoshima@vetmed.hokudai.ac.jp (Keisuke Aoshima).

## 20     **Abstract**

21             Canine hemangiosarcoma (HSA) is a malignant tumour derived from endothelial cells.

22     No effective treatment has yet been developed because of the lack of understanding of its

23     pathogenesis. Histone acetylation, an epigenetic modification, is highly associated with

24     cancer pathogenesis. Manipulating histone acetylation by histone deacetylase inhibitors

25     (HDACi) or bromodomain and extraterminal domain inhibitors (BETi) is one approach to

26     treat various cancers. However, the role of histone acetylation in HSA remains unknown. This

27     study aimed to investigate how histone acetylation functions in HSA pathogenesis using two

28     HDACi, suberanilohydroxamic acid (SAHA) and valproic acid (VPA), and one BETi, JQ1, *in*

29     *vitro* and *in vivo*. Histone acetylation levels were high in cell lines and heterogeneous in

30     clinical cases. SAHA and JQ1 induced apoptosis in HSA cell lines. SAHA and VPA

31     treatment in HSA cell lines upregulated inflammatory-related genes, thereby attracting

32     macrophages. This implies that SAHA and VPA can induce anti-tumour immunity. JQ1

33     stimulated autophagy and inhibited the cell cycle. Finally, JQ1 suppressed HSA tumour cell

34     proliferation *in vivo*. These results suggest that HDACi and BETi can be alternative drugs for

35     HSA treatment. Although further research is required, this study provides useful insights for

36     developing new treatments for HSA.

37

38     **Keywords:** BETi; HDACi; hemangiosarcoma; histone acetylation

## 39     **Introduction**

40             Canine hemangiosarcoma (HSA) is a malignant tumour derived from endothelial  
41     cells. Surgery and chemotherapy are conventional therapies for HSA, but the efficacy of these  
42     treatments was limited (Clifford et al., 2000). Since little is known about the molecular  
43     pathogenesis of HSA, more basic research on HSA is warranted.

44             Epigenetics such as DNA methylation and histone modifications regulates  
45     transcription, and it is involved in various biological processes such as embryonic  
46     development, metabolism, and diseases, including cancer (Kaelin and McKnight, 2013;  
47     Virani et al., 2012; Xu et al., 2021). Acetylated histone can promote transcription by binding  
48     to bromodomain and extraterminal (BET) proteins and loosening the chromatin structure by  
49     neutralizing the electric charges (Josling et al., 2012; Clayton et al., 2006).

50             In recent years, a growing number of reports have highlighted that histone  
51     acetylation is involved in cancer pathogenesis (Calcagno et al., 2019; Liu et al., 2018).  
52     Histone deacetylase inhibitors (HDACi) and BET inhibitors (BETi) have been used to  
53     investigate the function of histone acetylation and their treatment efficacy. HDACi inhibits  
54     histone deacetylase function, thereby increasing histone acetylation levels (West and  
55     Johnstone, 2014). BETi binds to the functional domain of BET proteins through which BET  
56     proteins cannot recognise acetylated histones (Bechter and Schöffski, 2020).  
57     Suberanilohydroxamic acid (SAHA) and valproic acid (VPA) are HDACis that have been  
58     reported to induce apoptosis *in vitro* and suppress tumour proliferation *in vivo* in human  
59     cancers (Claerhout et al., 2011; Lee et al., 2012; Uehara et al., 2012; Yagi et al., 2010).  
60     HDACi can also improve tumour immunity, and combination therapies with immune  
61     checkpoint inhibitors or chemotherapeutics enhance their efficacy in human cancers (Huang  
62     et al., 2017; Kim et al., 2020; Xue et al., 2016). BETi has also been broadly investigated as  
63     cancer drugs, including JQ1, which causes apoptosis, cell cycle arrest, and autophagy *in vitro*,

64 and impede tumour growth *in vivo* (Jostes et al., 2017; Li et al., 2019; Wen et al., 2019).

65           Regarding epigenetics in HSA, KDM2B—a histone demethylase—has recently been  
66 found to promote tumour viability (Gulay et al., 2021). However, the role of histone  
67 acetylation in HSA remains unknown. In this study, we aimed to investigate the role of  
68 histone acetylation and the effects of HDACi and BETi on HSA.

69

## 70 **Materials and Methods**

### 71 *Histopathology and immunohistochemistry (IHC)*

72           Tumour samples were obtained from patients presenting to Hokkaido University  
73 Veterinary Teaching Hospital with written informed consent (Table S1). Haematoxylin and  
74 eosin staining was performed as previously described (Maharani et al., 2018). IHC analysis  
75 was performed as previously described (Gulay et al., 2021) with slight modifications. Antigen  
76 retrieval was performed in Tris-EDTA buffer (pH 9.0) in a microwave for 10 min. Tissues  
77 were stained with anti-acetylated histone H3 antibody (1:250; #39140, Active Motif, CA,  
78 USA) overnight at 4°C. Quantification of IHC results was performed with QuPath using  
79 Nucleus DAB OD mean values, and the values in tumour cells were normalised against those  
80 in normal endothelial cells on the same slides for further analysis (Bankhead et al., 2017).

81

### 82 *Cell culture*

83           Canine aortic endothelial cells (CnAOEC: #Cn304-05, Cell Applications, CA, USA),  
84 seven canine HSA cell lines (JuA1, JuB2, JuB4, Re12, Re21, Ud2, and Ud6). (Murai et al.,  
85 2012), ISOS-1 obtained from the Cell Resource Center for Biomedical Research Cell Bank  
86 (Tohoku University) (Masuzawa et al., 1998), and RAW264 obtained from RIKEN  
87 Bioresource Center were cultured with Dulbecco's Modified Eagle Medium High Glucose  
88 (DMEM; #044-29765, Fujifilm Wako Pure Chemical Industries, Osaka, Japan) supplemented

with 10% foetal bovine serum (FBS; #S1580-500, Biowest, UT, USA) and penicillin–streptomycin solution (#168-23191, Fujifilm Wako) at 37°C with 5% CO<sub>2</sub>.

## *Drug preparation*

SAHA (#10009929, Cayman Chemical, MI, USA) was dissolved in dimethyl sulfoxide (DMSO) to a stock solution of 150 mg/ml. For *in vivo* studies, the stock solution of SAHA was diluted with 30% polyethylene glycol 400 and 5% Tween 80. VPA (#227-01071, Fujifilm Wako) was dissolved in PBS. JQ1 (#T117580, Toronto Research Chemicals, Toronto, Canada) was initially dissolved in DMSO to a stock solution of 50 mg/ml. For *in vivo* studies, the stock solution of JQ1 was diluted with 5% Tween 80.

## *Cell viability assay*

Two thousand cells were seeded in 96-well cell culture plates. The next day, they were treated with DMSO, SAHA, or JQ1. Survival rates and growth inhibition rates were analysed as previously described (Aoshima et al., 2018; Morita et al., 2019)<sup>1</sup>.

## *Apoptosis assay*

Apoptosis assay was performed using the FITC Annexin V Apoptosis Detection Kit I (#556547, BD Biosciences, NJ, USA) according to the manufacturer's instructions. Briefly, JuB4 and Re12 cells were treated with 10 µM SAHA or JQ1 for 24 h, and detached from dishes using TrypLE Express Enzyme (#12604013; Thermo Fisher Scientific). One million cells were suspended in the binding buffer and stained with annexin V. Cells were analysed with a BD FACSVerse flow cytometer (BD Biosciences), and the results were analysed with FCS Express 4 (De Novo Software, CA, USA).

<sup>1</sup> See: NCI 60 Cell Five-Dose Screen.

[https://dtp.cancer.gov/discovery\\_development/nci-60/methodology.htm](https://dtp.cancer.gov/discovery_development/nci-60/methodology.htm) (Accessed 21 October, 2021).

113

# 114 *RNA-Sequencing*

115 ISOS-1 were treated with 1  $\mu$ M SAHA for 24 h, 1  $\mu$ M JQ1 for 36 h, or 2 mM VPA  
116 for 36 h in triplicate. Total RNA was extracted with a NucleoSpin RNA isolation kit  
117 (#740955.50, Macherey-Nagel GmbH & Co. Düren, Germany) according to the  
118 manufacturer's instructions. RNA samples were submitted to Kazusa DNA Research  
119 Institution (Chiba, Japan) for further analyses. RNA-seq libraries were constructed using a  
120 QuantSeq 3'mRNA-Seq Library Prep Kit (LEXOGEN, Vienna, Austria) and sequenced with  
121 the NextSeq500 (Illumina, CA, USA) to generate a minimum of two million single-end 75-bp  
122 reads. Sequencing reads were mapped to the mm39 mouse reference genome using STAR,  
123 and expression levels were estimated using RSEM (Dobin and Gingeras, 2015; Li and Dewey,  
124 2011). Differential expression and gene expression profiles were analysed by edgeR and  
125 GSEA v4.1.0 (Robinson et al., 2009; Mootha et al., 2003; Subramanian et al., 2005),  
126 respectively.

127

# 128 *SA- $\beta$ -gal staining*

129 SA- $\beta$ -gal staining was performed using a Senescence  $\beta$ -Galactosidase Staining Kit  
130 (#9860, Cell Signaling Technology, MA, USA) according to the manufacturer's instructions.  
131 Briefly, ISOS-1 was treated with DMSO or 10  $\mu$ M JQ1 for 24 h and fixed with 4%  
132 paraformaldehyde (PFA) for 10 min at room temperature (RT). Cells were stained with  $\beta$ -  
133 Galactosidase Staining Solution containing 5-bromo-4-chloro-3-indolyl  $\beta$ -D-  
134 galactopyranoside (X-Gal: #16495, Cayman Chemical) for 13 h at 37°C. Positive cells were  
135 counted manually using an inverted microscope (BIOREVO BZ-9000; KEYENCE, Tokyo,  
136 Japan).

137

### Cell cycle analysis

ISOS-1, JuB2, JuB4, and Re12 were treated with DMSO or JQ1 for 24 h. ISOS-1 was treated with 10  $\mu$ M JQ1, and other cell lines were treated with 5  $\mu$ M JQ1. Cell cycle analysis was performed as previously described (Gulay et al., 2021).

### Migration assay

JuB4 and Re12 were treated with DMSO, 2  $\mu$ M SAHA, or 2 mM VPA for 48 h in 6-well plates. Then, after replacing the medium to the one without inhibitors, the cells were co-cultured with RAW264 seeded on ThinCert Cell Culture Inserts (#657630, Greiner Bio-One) for 24 h. RAW264 on the culture surface of the inserts were removed with a cotton swab. Migrated RAW264 on the bottom side of the inserts were fixed with 4% PFA for 30 min at RT and then stained with 0.01% crystal violet for 30 min at RT. The number of cells was counted manually in 10 fields at 200 $\times$  under a light microscope (BH-2; Olympus, Tokyo, Japan).

### Western blotting

Protein extraction and western blotting were performed as previously described (Gulay et al., 2021). Antibodies used in this study are listed in Table S2.

### Reverse transcription quantitative polymerase chain reaction (RT-qPCR)

Primers and samples were prepared as described previously (Gulay et al., 2021). RT-qPCR was performed using the primers listed in Table S3. Results were normalised according to the geometric mean of reference genes (*RPL32* and *HPRT* for canine genes and *Hprt* and *Tbp* for murine genes), which were selected from potential internal controls by geNorm (Fig. S1) (Vandesompele et al., 2002). Relative expression levels were calculated by setting the

DMSO-treated cells as the control.

# *Animal studies*

All mouse experiments were performed under the guidelines of Hokkaido University (protocol number: 20-0083), which follows the ARRIVE guidelines. Five-week-old female Balb/c and KSN/Slc mice (Japan SLC, Inc. Shizuoka, Japan) were used. A day before tumour cell inoculation, KSN/Slc mice were treated with 100 µL 2.5 mg/ml anti-asialo GM1 (014-09801, Fujifilm Wako) to increase the success rate of JuB2 transplantation (Yoshino et al., 2000). Five million cells were inoculated subcutaneously in both flanks of Balb/c and KSN/Slc mice, which were anaesthetised with 0.3 mg/kg medetomidine (Domitor, ZENOAQ, Tokyo, Japan), 4 mg/kg midazolam (Dormicum, Maruishi Pharmaceutical Co., Ltd. Osaka, Japan) and 5 mg/kg butorphanol (Vetorphale, Meiji Seika Pharma Co., Ltd. Tokyo, Japan). After tumour cell inoculation, mice were awoken by intraperitoneal injection of 3 mg/kg atipamezole (Atipame, Kyoritsu Seiyaku Corporation, Tokyo, Japan). Tumour volumes were calculated using the formula:  $\text{Volume} = (\text{Length} \times \text{Width}^2)/2$ . When the tumour volume reached 100 mm<sup>3</sup>, mice were treated with the vehicle control or inhibitors. Mice were intraperitoneally injected with SAHA (150 mg/kg) daily, VPA (200 mg/kg) five times weekly, or JQ1 (50 mg/kg) daily. Mice were examined at least twice weekly to check their health status and to measure tumour sizes. Balb/c mice were euthanized with CO<sub>2</sub> when tumours reached 1000 mm<sup>3</sup> in volume. KSN/Slc mice were euthanized with CO<sub>2</sub> 11 or 12 days after treatment initiation.

# *Statistical analysis*

Statistical analyses were performed with R (version 4.1.0). Fisher's exact test was used to analyse the ratio of acetylated H3 staining levels. Student's *t*-test or Mann-whitney test



were used to analyse the differences between two groups, whereas Tukey's test was used to analyse differences among multiple groups. Survival curves were analysed using the log-rank test. Overall tumour growth was analysed with two-way ANOVA.

## Results

### *Histone acetylation levels in HSA cells are high in vitro and heterogeneous in vivo*

We first analysed histone acetylation levels in HSA cell lines and CnAOEC. We found that global acetylation of H2B, H3, and H4 was significantly enriched in all HSA cell lines compared with CnAOEC (Fig. 1A). Then, we examined global acetylated histone H3 levels in 10 clinical HSA cases. These cases were classified into three types according to their histological pattern: solid, capillary, or cavernous (Kim et al., 2015). Five cases had a single histological pattern, while the other five possessed multiple proliferation patterns (Fig. 1B). We also classified histone H3 acetylation levels into three groups based on the normalized values: negative (< 0.5), weak (0.5–2.0), and strong (> 2.0) (Figs. 1C and 1D). The results showed that the histone H3 acetylation levels of tumour cells were heterogeneous, and the ratio was different depending on their histological pattern even in the same tumour tissue (Figs. 1E and 1F). Furthermore, the ratio of tumour cells classified as negative was the highest in the solid pattern followed by the capillary pattern, and the lowest in the cavernous pattern (Fig. 1F). These results suggest that histone H3 acetylation levels are heterogeneous in tumour cells and are associated with their histopathological patterns.

### *SAHA and JQ1 induce apoptosis in HSA cell lines*

To examine the roles of histone acetylation in HSA, we modified histone acetylation levels using HDACi (SAHA and VPA) and BETi (JQ1). First, we evaluated whether global histone acetylation levels were altered by these inhibitors. SAHA and VPA treatments

increased global histone acetylation levels in both canine and murine HSA cell lines, whereas JQ1 decreased them in canine HSA cell lines but not in ISOS-1 (Fig. 2A). Then, we examined the effects of HDACi and BETi on HSA cell proliferation. SAHA and JQ1 treatment significantly decreased the number of cells, while VPA treatment did not affect their proliferation (Fig. 2B). IC<sub>50</sub> values of the inhibitors in HSA cell lines were almost or less than one-tenth of those in CnAOEC, which indicated that HSA cell lines were more susceptible to these inhibitors than CnAOEC (Fig. 2C). Then, we checked apoptosis markers and found that SAHA and JQ1 increased cleaved caspase 3 expression levels and annexin V positivity in HSA cell lines except for JQ1-treated ISOS-1 (Figs. 2D–F). Finally, we evaluated protein expression and phosphorylation levels of cell survival proteins AKT and ERK. Although the results were different among the cell lines, either total or phosphorylated AKT or ERK levels were downregulated by SAHA and JQ1 but not by VPA (Fig. S2B). These results suggested that SAHA and JQ1 induced apoptosis in HSA cell lines except for ISOS-1 treated with JQ1, and that VPA did not induce cell death in all HSA cell lines.

#### *SAHA and VPA activate inflammatory responses in HSA cell lines*

We further investigated the mechanisms of their effects in HSA cells. GSEA indicated that inflammatory-related gene expression was positively correlated in SAHA and VPA treatment in ISOS-1 (Fig. 3A). Consistent with this, *Il6*, *Cxcl1*, *Ccl2*, *Ccl7*, and *Oas1a* were upregulated more than two-fold following treatment with either SAHA or VPA or both (Fig. 3B). We wanted to extrapolate these findings to canine HSA, but *CXCL1* and *CCL2* do not exist in the canine genome and *CCL7* expression was not detected. However, *OAS1*, the orthologue of murine *Oas1a*, and other inflammatory-related genes were upregulated more than two-fold in canine HSA cell lines treated with SAHA and/or VPA (Fig. 3C). Inflammatory responses in tumour cells can induce immune cell migration, leading to host

immune responses to tumour tissues. Therefore, to corroborate whether SAHA and VPA treatment in HSA cell lines can attract immune cells, a macrophage migration assay was performed using RAW264 (Fig. 3D). RAW264 migrated when they were co-cultured with SAHA-treated JuB4 or VPA-treated Re12 (Fig. 3E).

These results suggest that SAHA and VPA can induce inflammatory responses in HSA cell lines. This could attract macrophages, although it depends on the combination of HSA cell lines and HDACi.

#### *JQ1 induces autophagy and impedes the cell cycle in HSA cell lines*

We also investigated the genome-wide gene expression changes in JQ1-treated ISOS-1. GSEA showed that autophagy-related gene expression and cell cycle related-gene expression were positively and negatively correlated, respectively (Figs 4A and 4B). These expression changes were validated by RT-qPCR (Fig. 4C). LC3-II, an active autophagy marker, was expressed at significantly higher levels in all JQ1-treated HSA cell lines except for Re12 compared with DMSO controls (Fig. 4D).

Then, we generated growth inhibition curves through which we could evaluate whether the cells actively died or slowed their proliferation by JQ1. The results showed that growth inhibition rates were positive even when the cells were treated with 10  $\mu$ M JQ1, which indicated that the cell cycle was impeded, and active cell death did not occur (Fig. 5A). BrdU and propidium iodide (PI) staining revealed that proliferating cells (BrdU+ cells) were significantly decreased in both murine and canine HSA cell lines by JQ1 (Fig. 5B). PI signals showed that the percentage of dead cells was slightly increased by JQ1 in ISOS-1, but its extent was significantly lower than in canine HSA cell lines (Fig. 5C). We also examined cell senescence by performing SA- $\beta$ -gal staining. The results indicated that JQ1-treated ISOS-1 showed a significantly higher number of positive cells than DMSO-treated cells (Fig. 5D).

These results suggest that autophagy activation and cell cycle downregulation are induced by JQ1, and that cell senescence but not apoptosis is caused by JQ1 in ISOS-1.

#### *JQ1 suppresses HSA tumour growth in vivo*

Finally, to evaluate the treatment effects of SAHA, VPA, and JQ1 *in vivo*, we treated ISOS-1 tumour-bearing Balb/c mice with SAHA, VPA, or JQ1. The results showed that only JQ1 slowed tumour growth and extended the survival rates (Fig. 6A and B). We also treated JuB2 tumour-bearing KSN/Slc mice with JQ1 and showed that JQ1 also suppressed JuB2 tumour growth (Fig. 6C). These treatments did not cause body weight loss in mice (Fig. S3).

These results suggest that JQ1 has suppressive effects on HSA tumour growth *in vivo*.

## **Discussion**

HSA tumour cells in clinical cases showed various H3 acetylation levels even in the same tumour tissue. Moreover, this heterogeneity differed depending on the histological pattern. This can be explained by the differentiation status of the tumour cells. Global histone acetylation levels have been reported to be increased as cells differentiate (Ashktorab et al., 2009; Golob et al., 2008). Furthermore, HSA tumour cells forming the solid pattern are considered to be undifferentiated (Göriz et al., 2013). Given that the percentage of tumour cells classified as H3 acetylation-negative was high in the solid pattern, they could be more undifferentiated than other tumour cells. Further research is required to clarify whether global histone acetylation levels reflect the differentiation status of HSA tumour cells.

We demonstrated that SAHA and VPA upregulated inflammatory-related genes. Moreover, SAHA-treated JuB4 and VPA-treated Re12 attracted RAW264. Several reports indicated that HDACi activated immune responses and enhanced immune cell functions (Cox et al., 2020; Laengle et al., 2020; Sun et al., 2019); thus, SAHA and VPA could also be used

as alternative therapeutics for HSA. In our study, however, SAHA and VPA did not suppress tumour growth of ISOS-1 in an immunocompetent mouse model. This implies that the condition we tested was not able to sufficiently induce the immune response. Co-treatment with other drugs such as doxorubicin or immune checkpoint inhibitors would be beneficial for HSA treatment by further stimulating immune responses (Le et al., 2017; Tubbs and Nussenzweig, 2017; Igase et al., 2020; Maekawa et al., 2017). In our study, we only showed the results from the RAW264 migration assay. Further studies are required to investigate if canine-derived macrophages exhibit the same results and if the migrated macrophages possess anti-tumour functions.

We revealed that JQ1 suppressed tumour growth in HSA cell lines. Several reports demonstrated that JQ1 or other BETi had anti-tumour effects, and clinical trials are ongoing (Shorstova et al., 2021; Wen et al., 2019). Given that our results could not demonstrate tumour regression upon JQ1 treatment, further research is required to enhance its efficacy and to identify another BETi that can regress HSA tumour growth *in vivo*.

## Conclusions

We demonstrated that HDACi and BETi can be used for HSA treatment. Although further research is required, this work provides useful insights for developing new HSA treatments.

## Conflict of interest statement

The authors declare that there is no conflict of interest in this study.

## Acknowledgements

We would like to extend our sincerest gratitude to Dr. Hiroki Sakai, Gifu University,

for providing canine hemangiosarcoma cell lines. We also acknowledge the efforts of Drs. Mitsuyoshi Takiguchi, Shintaro Kobayashi, and Hironobu Yasui, Faculty of Veterinary Medicine, Hokkaido University for giving useful pieces of advice and constructive discussion. We are grateful to all the members of the Laboratory of Comparative Pathology, Faculty of Veterinary Medicine, Hokkaido University for their helpful discussions, encouragement, and support. This research was supported by KAKENHI Grant-in-Aid for Young Scientists (KA, Number 20K15654) provided by Japan Society for the Promotion of Science. We thank H. Nikki March, PhD, from Edanz (<https://jp.edanz.com/ac>) for editing a draft of this manuscript.

## References

- Aoshima, K., Fukui, Y., Gulay, K.C.M., Erdemsurakh, O., Morita, A., Kobayashi, A., Kimura, T., 2018. Notch2 signal is required for the maintenance of canine hemangiosarcoma cancer stem cell-like cells. *BMC Vet. Res.* 14.
- Ashktorab, H., Belgrave, K., Hosseinkhah, F., Brim, H., Nouraie, M., Takkikto, M., Hewitt, S., Lee, E.L., Dashwood, R.H., Smoot, D., 2009. Global histone H4 acetylation and HDAC2 expression in colon adenoma and carcinoma. *Dig. Dis. Sci.* 54, 2109–2117.
- Bankhead, P., Loughrey, M.B., Fernández, J.A., Dombrowski, Y., McArt, D.G., Dunne, P.D., McQuaid, S., Gray, R.T., Murray, L.J., Coleman, H.G., et al., 2017. QuPath: Open source software for digital pathology image analysis. *Sci. Rep.* 7.
- Bechter, O., Schöffski, P., 2020. Make your best BET: The emerging role of BET inhibitor treatment in malignant tumors. *Pharmacol. Ther.*
- Bellarosa, D., Bressan, A., Bigioni, M., Parlani, M., Maggi, C.A., Binaschi, M., 2012. SAHA/Vorinostat induces the expression of the CD137 receptor/ligand system and enhances apoptosis mediated by soluble CD137 receptor in a human breast cancer cell line. *Int. J. Oncol.* 41, 1486–1494.
- Benton, C.B., Fiskus, W., Bhalla, K.N., 2017. Targeting Histone Acetylation: Readers and Writers in Leukemia and Cancer. *Cancer J. (United States)*.
- Calcagno, D.Q., Wisnieski, F., Da Silva Mota, E.R., Maia De Sousa, S.B., Costa Da Silva, J.M., Leal, M.F., Giguek, C.O., Santos, L.C., Rasmussen, L.T., Assumpção, P.P., et al., 2019. Role of histone acetylation in gastric cancer: Implications of dietetic compounds and clinical perspectives. *Epigenomics*.
- Claerhout, S., Lim, J.Y., Choi, W., Park, Y.Y., Kim, K.H., Kim, S.B., Lee, J.S., Mills, G.B., Cho, J.Y., 2011. Gene expression signature analysis identifies vorinostat as a candidate therapy for gastric cancer. *PLoS One* 6.

Clayton, A.L., Hazzalin, C.A., Mahadevan, L.C., 2006. Enhanced Histone Acetylation and Transcription: A Dynamic Perspective. *Mol. Cell.*

Clifford, C.A., Mackin, A.J., Henry, C.J., 2000. Treatment of canine hemangiosarcoma: 2000 and beyond. *J. Vet. Intern. Med.*

Cox, D.J., Coleman, A.M., Gogan, K.M., Phelan, J.J., Ó Maoldomhnaigh, C., Dunne, P.J., Basdeo, S.A., Keane, J., 2020. Inhibiting Histone Deacetylases in Human Macrophages Promotes Glycolysis, IL-1 $\beta$ , and T Helper Cell Responses to Mycobacterium tuberculosis. *Front. Immunol.* 11.

Dobin, A., Gingeras, T.R., 2015. Mapping RNA-seq Reads with STAR. *Curr. Protoc. Bioinforma.* 51, 11.14.1-11.14.19.

Golob, J.L., Paige, S.L., Muskheli, V., Pabon, L., Murry, C.E., 2008. Chromatin remodeling during mouse and human embryonic stem cell differentiation. *Dev. Dyn.* 237, 1389–1398.

Görizt, M., Müller, K., Krastel, D., Staudacher, G., Schmidt, P., Kühn, M., Nickel, R., Schoon, H.A., 2013. Canine splenic haemangiosarcoma: Influence of metastases, chemotherapy and growth pattern on post-splenectomy survival and expression of angiogenic factors. *J. Comp. Pathol.* 149, 30–39.

Gulay, K.C.M., Aoshima, K., Shibata, Y., Yasui, H., Yan, Q., Kobayashi, A., Kimura, T., 2021. KDM2B promotes cell viability by enhancing DNA damage response in canine hemangiosarcoma. *J. Genet. Genomics* 48, 618–630.

Guo, P., Chen, W., Li, H., Li, M., Li, L., 2018. The Histone Acetylation Modifications of Breast Cancer and their Therapeutic Implications. *Pathol. Oncol. Res.*

Han, W., Sun, J., Feng, L., Wang, K.F., Li, D., Pan, Q., Chen, Y., Jin, W., Wang, X., Pan, H., et al., 2011. Autophagy inhibition enhances daunorubicin-induced apoptosis in K562 cells. *PLoS One* 6.

Hou, Y.J., Dong, L.W., Tan, Y.X., Yang, G.Z., Pan, Y.F., Li, Z., Tang, L., Wang, M., Wang, Q., Wang, H.Y., 2011. Inhibition of active autophagy induces apoptosis and increases chemosensitivity in cholangiocarcinoma. *Lab. Investig.* 91, 1146–1157.

Huang, P., Almeciga-Pinto, I., Jarpe, M., van Duzer, J.H., Mazitschek, R., Yang, M., Jones, S.S., Quayle, S.N., 2017. Selective HDAC inhibition by ACY-241 enhances the activity of paclitaxel in solid tumor models. *Oncotarget* 8, 2694–2707.

Igase, M., Nemoto, Y., Itamoto, K., Tani, K., Nakaichi, M., Sakurai, M., Sakai, Y., Noguchi, S., Kato, M., Tsukui, T., et al., 2020. A pilot clinical study of the therapeutic antibody against canine PD-1 for advanced spontaneous cancers in dogs. *Sci. Rep.* 10.

Jones, P.A., Baylin, S.B., 2007. The Epigenomics of Cancer. *Cell.*

Josling, G.A., Selvarajah, S.A., Petter, M., Duffy, M.F., 2012. The role of bromodomain



proteins in regulating gene expression. *Genes* (Basel).

Jostes, S., Nettersheim, D., Fellermeier, M., Schneider, S., Hafezi, F., Honecker, F., Schumacher, V., Geyer, M., Kristiansen, G., Schorle, H., 2017. The bromodomain inhibitor JQ1 triggers growth arrest and apoptosis in testicular germ cell tumours in vitro and in vivo. *J. Cell. Mol. Med.* 21, 1300–1314.

Kabeya, Y., Mizushima, N., Ueno, T., Yamamoto, A., Kirisako, T., Noda, T., Kominami, E., Ohsumi, Y., Yoshimori, T., 2000. LC3, a mammalian homologue of yeast Apg8p, is localized in autophagosome membranes after processing. *EMBO J.* 19, 5720–5728.

Kaelin, W.G., McKnight, S.L., 2013. Influence of metabolism on epigenetics and disease. *Cell*.

Kim, J.H., Graef, A.J., Dickerson, E.B., Modiano, J.F., 2015. Pathobiology of hemangiosarcoma in dogs: Research advances and future perspectives. *Vet. Sci.*

Kim, Y.D., Park, S.M., Ha, H.C., Lee, A.R., Won, H., Cha, H., Cho, S., Cho, J.M., 2020. HDAC Inhibitor, CG-745, enhances the anti-cancer effect of anti-PD-1 immune checkpoint inhibitor by modulation of the immune microenvironment. *J. Cancer* 11, 4059–4072.

Laengle, J., Kabiljo, J., Hunter, L., Homola, J., Prodinger, S., Egger, G., Bergmann, M., 2020. Histone deacetylase inhibitors valproic acid and vorinostat enhance trastuzumab-mediated antibody-dependent cell-mediated phagocytosis. *J. Immunother. Cancer* 8.

Le, D.T., Durham, J.N., Smith, K.N., Wang, H., Bartlett, B.R., Aulakh, L.K., Lu, S., Kemberling, H., Wilt, C., Lubner, B.S., et al., 2017. Mismatch repair deficiency predicts response of solid tumors to PD-1 blockade. *Science* (80-. ). 357, 409–413.

Lee, Y.J., Won, A.J., Lee, J., Jung, J.H., Yoon, S., Lee, B.M., Kim, H.S., 2012. Molecular mechanism of SAHA on regulation of autophagic cell death in tamoxifen-resistant MCF-7 breast cancer cells. *Int. J. Med. Sci.* 9, 881–893.

Li, B., Dewey, C.N., 2011. RSEM: Accurate transcript quantification from RNA-Seq data with or without a reference genome. *BMC Bioinformatics* 12.

Li, F., Yang, C., Zhang, H.B., Ma, J., Jia, J., Tang, X., Zeng, J., Chong, T., Wang, X., He, D., et al., 2019. BET inhibitor JQ1 suppresses cell proliferation via inducing autophagy and activating LKB1/AMPK in bladder cancer cells. *Cancer Med.* 8, 4792–4805.

Liu, K.Y., Wang, L.T., Hsu, S.H., 2018. Modification of epigenetic histone acetylation in hepatocellular carcinoma. *Cancers* (Basel).

Maekawa, N., Konnai, S., Takagi, S., Kagawa, Y., Okagawa, T., Nishimori, A., Ikebuchi, R., Izumi, Y., Deguchi, T., Nakajima, C., et al., 2017. A canine chimeric monoclonal antibody targeting PD-L1 and its clinical efficacy in canine oral malignant melanoma or undifferentiated sarcoma. *Sci. Rep.* 7.

Maharani, A., Aoshima, K., Onishi, S., Gulay, K.C.M., Kobayashi, A., Kimura, T., 2018.



Cellular atypia is negatively correlated with immunohistochemical reactivity of CD31 and vWF expression levels in canine hemangiosarcoma. *J. Vet. Med. Sci.* 80, 213–218.

Masuzawa, M., Fujimura, T., Tsubokawa, M., Nishiyama, S., Katsuoka, K., Terada, E., Kunita, S., Sakurai, Y., Kato, H., 1998. Establishment of a new murine-phenotypic angiosarcoma cell line (ISOS- 1). *J. Dermatol. Sci.* 16, 91–98.

Mootha, V.K., Lindgren, C.M., Eriksson, K.F., Subramanian, A., Sihag, S., Lehar, J., Puigserver, P., Carlsson, E., Ridderstråle, M., Laurila, E., et al., 2003. PGC-1 $\alpha$ -responsive genes involved in oxidative phosphorylation are coordinately downregulated in human diabetes. *Nat. Genet.* 34, 267–273.

Morita, A., Aoshima, K., Gulay, K.C.M., Onishi, S., Shibata, Y., Yasui, H., Kobayashi, A., Kimura, T., 2019. High drug efflux pump capacity and low DNA damage response induce doxorubicin resistance in canine hemangiosarcoma cell lines. *Res. Vet. Sci.* 127, 1–10.

Murai, A., Asa, S.A., Kodama, A., Hirata, A., Yanai, T., Sakai, H., 2012. Constitutive phosphorylation of the mTORC2/Akt/4E-BP1 pathway in newly derived canine hemangiosarcoma cell lines. *BMC Vet. Res.* 8.

Pagiatakis, C., Musolino, E., Gornati, R., Bernardini, G., Papait, R., 2021. Epigenetics of aging and disease: a brief overview. *Aging Clin. Exp. Res.*

Pratap, J., Akech, J., Wixted, J.J., Szabo, G., Hussain, S., McGee-Lawrence, M.E., Li, X., Bedard, K., Dhillon, R.J., Van Wijnen, A.J., et al., 2010. The histone deacetylase inhibitor, vorinostat, reduces tumor growth at the metastatic bone site and associated osteolysis, but promotes normal bone loss. *Mol. Cancer Ther.* 9, 3210–3220.

Proske, J., Walter, L., Bumes, E., Hutterer, M., Vollmann-Zwerenz, A., Eyüpoglu, I.Y., Savaskan, N.E., Seliger, C., Hau, P., Uhl, M., 2016. Adaptive immune response to and survival effect of temozolomide-and valproic acid-induced autophagy in glioblastoma. *Anticancer Res.* 36, 899–906.

Qiu, H., Jackson, A.L., Kilgore, J.E., Zhong, Y., Chan, L.L.Y., Gehrig, P.A., Zhou, C., Bae-Jump, V.L., 2015. JQ1 suppresses tumor growth through downregulating LDHA in ovarian cancer. *Oncotarget* 6, 6915–6930.

Robinson, M.D., McCarthy, D.J., Smyth, G.K., 2009. edgeR: A Bioconductor package for differential expression analysis of digital gene expression data. *Bioinformatics* 26, 139–140.

Shorstova, T., Foulkes, W.D., Witcher, M., 2021. Achieving clinical success with BET inhibitors as anti-cancer agents. *Br. J. Cancer.*

Subramanian, A., Tamayo, P., Mootha, V.K., Mukherjee, S., Ebert, B.L., Gillette, M.A., Paulovich, A., Pomeroy, S.L., Golub, T.R., Lander, E.S., et al., 2005. Gene set enrichment analysis: A knowledge-based approach for interpreting genome-wide expression profiles. *Proc. Natl. Acad. Sci. U. S. A.* 102, 15545–15550.

- 504 Sun, T., Li, Y., Yang, W., Wu, H., Li, X., Huang, Y., Zhou, Y., Du, Z., 2019. Histone  
505 deacetylase inhibition up-regulates MHC class I to facilitate cytotoxic T lymphocyte-  
506 mediated tumor cell killing in glioma cells. *J. Cancer* 10, 5638–5645.  
507
- 508 Tubbs, A., Nussenzweig, A., 2017. Endogenous DNA Damage as a Source of Genomic  
509 Instability in Cancer. *Cell*.  
510
- 511 Uehara, N., Kanematsu, S., Miki, H., Yoshizawa, K., Tsubura, A., 2012. Requirement of p38  
512 MAPK for a cell-death pathway triggered by vorinostat in MDA-MB-231 human breast  
513 cancer cells. *Cancer Lett.* 315, 112–121.  
514
- 515 Vandesompele, J., De Preter, K., Pattyn, F., Poppe, B., Van Roy, N., De Paepe, A., Speleman,  
516 F., 2002. Accurate normalization of real-time quantitative RT-PCR data by geometric  
517 averaging of multiple internal control genes. *Genome Biol.* 3.  
518
- 519 Virani, Shama, Virani, Shami, Colacino, J.A., Kim, J.H., Rozek, L.S., 2012. Cancer  
520 epigenetics: a brief review. *ILAR J*.  
521
- 522 Wen, N., Guo, B., Zheng, H., Xu, L., Liang, H., Wang, Q., Wang, D., Chen, X., Zhang, S., Li,  
523 Y., et al., 2019. Bromodomain inhibitor jql induces cell cycle arrest and apoptosis of  
524 glioma stem cells through the VEGF/PI3K/AKT signaling pathway. *Int. J. Oncol.* 55,  
525 879–895.  
526
- 527 West, A.C., Johnstone, R.W., 2014. New and emerging HDAC inhibitors for cancer treatment.  
528 *J. Clin. Invest.*  
529
- 530 Xia, Q., Sung, J., Chowdhury, W., Chen, C.L., Höti, N., Shabbeer, S., Carducci, M.,  
531 Rodriguez, R., 2006. Chronic administration of valproic acid inhibits prostate cancer cell  
532 growth in vitro and in vivo. *Cancer Res.* 66, 7237–7244.  
533
- 534 Xu, R., Li, C., Liu, X., Gao, S., 2021. Insights into epigenetic patterns in mammalian early  
535 embryos. *Protein Cell*.  
536
- 537 Xue, K., Gu, J.J., Zhang, Q., Mavis, C., Hernandez-Ilizaliturri, F.J., Czuczman, M.S., Guo, Y.,  
538 2016. Vorinostat, a histone deacetylase (HDAC) inhibitor, promotes cell cycle arrest and  
539 re-sensitizes rituximab- and chemo-resistant lymphoma cells to chemotherapy agents. *J.*  
540 *Cancer Res. Clin. Oncol.* 142, 379–387.  
541
- 542 Yagi, Y., Fushida, S., Harada, S., Kinoshita, J., Makino, I., Oyama, K., Tajima, H., Fujita, H.,  
543 Takamura, H., Ninomiya, I., et al., 2010. Effects of valproic acid on the cell cycle and  
544 apoptosis through acetylation of histone and tubulin in a scirrhous gastric cancer cell line.  
545 *J. Exp. Clin. Cancer Res.* 29.  
546
- 547 Yang, W., Hosford, S.R., Traphagen, N.A., Shee, K., Demidenko, E., Liu, S., Miller, T.W.,  
548 2018. Autophagy promotes escape from phosphatidylinositol 3-kinase inhibition in  
549 estrogen receptor-positive breast cancer. *FASEB J.* 32, 1222–1235.  
550
- 551 Yoshino, H., Ueda, T., Kawahata, M., Kobayashi, K., Ebihara, Y., Manabe, A., Tanaka, R.,  
552 Ito, M., Asano, S., Nakahata, T., et al., 2000. Natural killer cell depletion by anti-asialo  
553 GM1 antiserum treatment enhances human hematopoietic stem cell engraftment in

554 NOD/Shi-scid mice. Bone Marrow Transplant. 26, 1211–1216.  
555  
556 Zheng, H., Zhao, W., Yan, C., Watson, C.C., Massengill, M., Xie, M., Massengill, C., Noyes,  
557 D.R., Martinez, G. V., Afzal, R., et al., 2016. HDAC inhibitors enhance T-cell  
558 chemokine expression and augment response to PD-1 immunotherapy in lung  
559 adenocarcinoma. Clin. Cancer Res. 22, 4119–4132.  
560  
561

## Figure legends

### **Figure 1. Histone acetylation levels in HSA cells are high *in vitro* and heterogenous *in vivo*.**

(A) Western blot analysis of acetylated histone H2B, H3, and H4. (B) Representative images of HE and IHC staining in clinical HSA cases. Scale bars = 50  $\mu$ m. (C) Box plots for normalized nucleus DAB OD mean values in 10 clinical HSA cases. (D) Representative IHC images of the classifications according to normalised acetylated H3 intensities in each histological pattern. Arrowheads indicate the nuclei of tumour cells. (E) Stacked bar graphs indicating the ratio of each staining level in 10 clinical cases. (F) Stacked bar graphs comparing the ratio of each staining level according to the histological patterns in all cases or within each case. \* $P < 0.05$ , \*\* $P < 0.01$ . Fisher's exact test.

### **Figure 2. SAHA and JQ1 induce apoptosis in HSA cell lines.**

(A) Western blot analysis of acetylated H2B, H3, and H4 in canine HSA cell lines (JuB2, JuB4, Re12) and a murine HSA cell line (ISOS-1) treated with DMSO, SAHA, JQ1, or VPA. (B) Phase contrast images of canine and murine HSA cell lines 48 h after treatment with DMSO, SAHA, VPA, or JQ1. Scale bars = 100  $\mu$ m. (C) Survival curves (top) and IC<sub>50</sub> values (bottom) of canine and murine HSA cell lines treated with SAHA or JQ1 for 60 h. All samples were analysed in triplicate. Data are plotted as average percentages  $\pm$  SD. (D) Western blot analysis of cleaved caspase 3 in canine and murine HSA cells treated with DMSO, SAHA, or JQ1. Uncropped images of JuB4 and Re12 are shown in Figure S2A. (E) Annexin V staining of canine and murine HSA cells treated with DMSO, SAHA, or JQ1. (F) Percentages of apoptotic cells (annexin V-positive) in canine and murine HSA cells treated with DMSO, SAHA, or JQ1. All samples were analysed in triplicate. Data are plotted as average percentages  $\pm$  SD. \* $P < 0.05$ , \*\* $P < 0.01$ . Tukey's  $t$  test.

587

588 **Figure 3. SAHA and VPA activate inflammatory responses in HSA cell lines.**

589 (A) (Left) GSEA results in ISOS-1 treated with SAHA (top) or VPA (bottom). Inflammatory-  
 590 related gene sets are highlighted in red. The number of genes in each gene set is shown next  
 591 to each bar. (Right) Representative GSEA plots of enriched gene sets in ISOS-1 treated with  
 592 SAHA (top) or VPA (bottom). (B) RT-qPCR results of genes related to inflammatory  
 593 responses in ISOS-1 treated with SAHA or VPA. (C) RT-qPCR results of inflammatory-  
 594 related genes in JuB4 and Re12 treated with SAHA or VPA. (D) Graphical images of  
 595 migration assay. (E) Quantitative analysis of migrated RAW264 cells co-cultured with SAHA  
 596 or VPA-treated Re12. \* $P < 0.05$ , \*\* $P < 0.01$ . Tukey's  $t$  test.

597

598 **Figure 4. JQ1 treatment induces autophagy in canine and murine HSA cell lines.**

599 (A) Positively (top) or negatively (bottom) enriched gene sets by GSEA in ISOS-1 treated  
 600 with JQ1 compared with DMSO-treated cells. The number of genes in each gene set is shown  
 601 next to each bar. (B) Representative GSEA plots of positively (top) and negatively (bottom)  
 602 enriched gene sets. (C) RT-qPCR of genes related to autophagy (top) and cell cycle (bottom)  
 603 in ISOS-1 treated with DMSO or JQ1. (D) Western blot analysis of LC3 protein in canine and  
 604 murine HSA cell lines treated with DMSO or JQ1.

605

606 **Fig. 5. JQ1 treatment impedes the cell cycle in canine and murine HSA cell lines.**

607 (A) Growth inhibition curve of ISOS-1 treated with JQ1. All samples were analysed in  
 608 triplicate. Data are plotted as average percentages  $\pm$  SD. (B) Density plots (left) and  
 609 quantitative analysis (right) of BrdU-positive cells in canine and murine HSA cell lines  
 610 treated with DMSO or JQ1. All samples were analysed in triplicate. (C) Histograms of PI-  
 611 positive cells (left) and quantitative analysis of dead cells (right) in canine and murine HSA

cell lines treated with DMSO and JQ1. All samples were analysed in triplicate. (D) (Left) Representative images of SA- $\beta$ -gal staining in ISOS-1 treated with DMSO or JQ1. Arrowheads indicate positive cells. (Right) Quantitative analysis of SA- $\beta$ -gal-positive cells. Positive cells were counted in 10 fields under 200 $\times$  magnification with a light microscope. The average numbers were plotted with  $\pm$  SD. Scale bars = 100  $\mu$ m. \* $P$  < 0.05, \*\* $P$  < 0.01. Student's  $t$ -test.

**Figure 6. JQ1 suppresses HSA tumour growth *in vivo*.**

(A) Kaplan–Meier survival curves of ISOS-1-inoculated Balb/c mice treated with DMSO (n=5), SAHA (n=5), VPA (n=4), or JQ1 (n=5). Days were counted after initiating drug treatment.  $P$ -values were calculated using the log-rank test. (B) Individual growth curves of ISOS-1 tumours in Balb/c mice treated with DMSO, SAHA, VPA, or JQ1 after treatment initiation. (C) (Left) Individual tumour growth curves of JuB2 tumours in KSN/Slc mice treated with DMSO or JQ1. The day when the treatment began was defined as day 1. \*\*\* $P$  < 0.001. Two-way ANOVA. (Right) Box plots of relative tumour volumes on the last day in KSN/Slc mice treated with DMSO or JQ1. Relative tumour volumes were calculated by dividing the tumour volume on the last day by that at day 1. \* $P$  < 0.05, Mann-whitney U test.



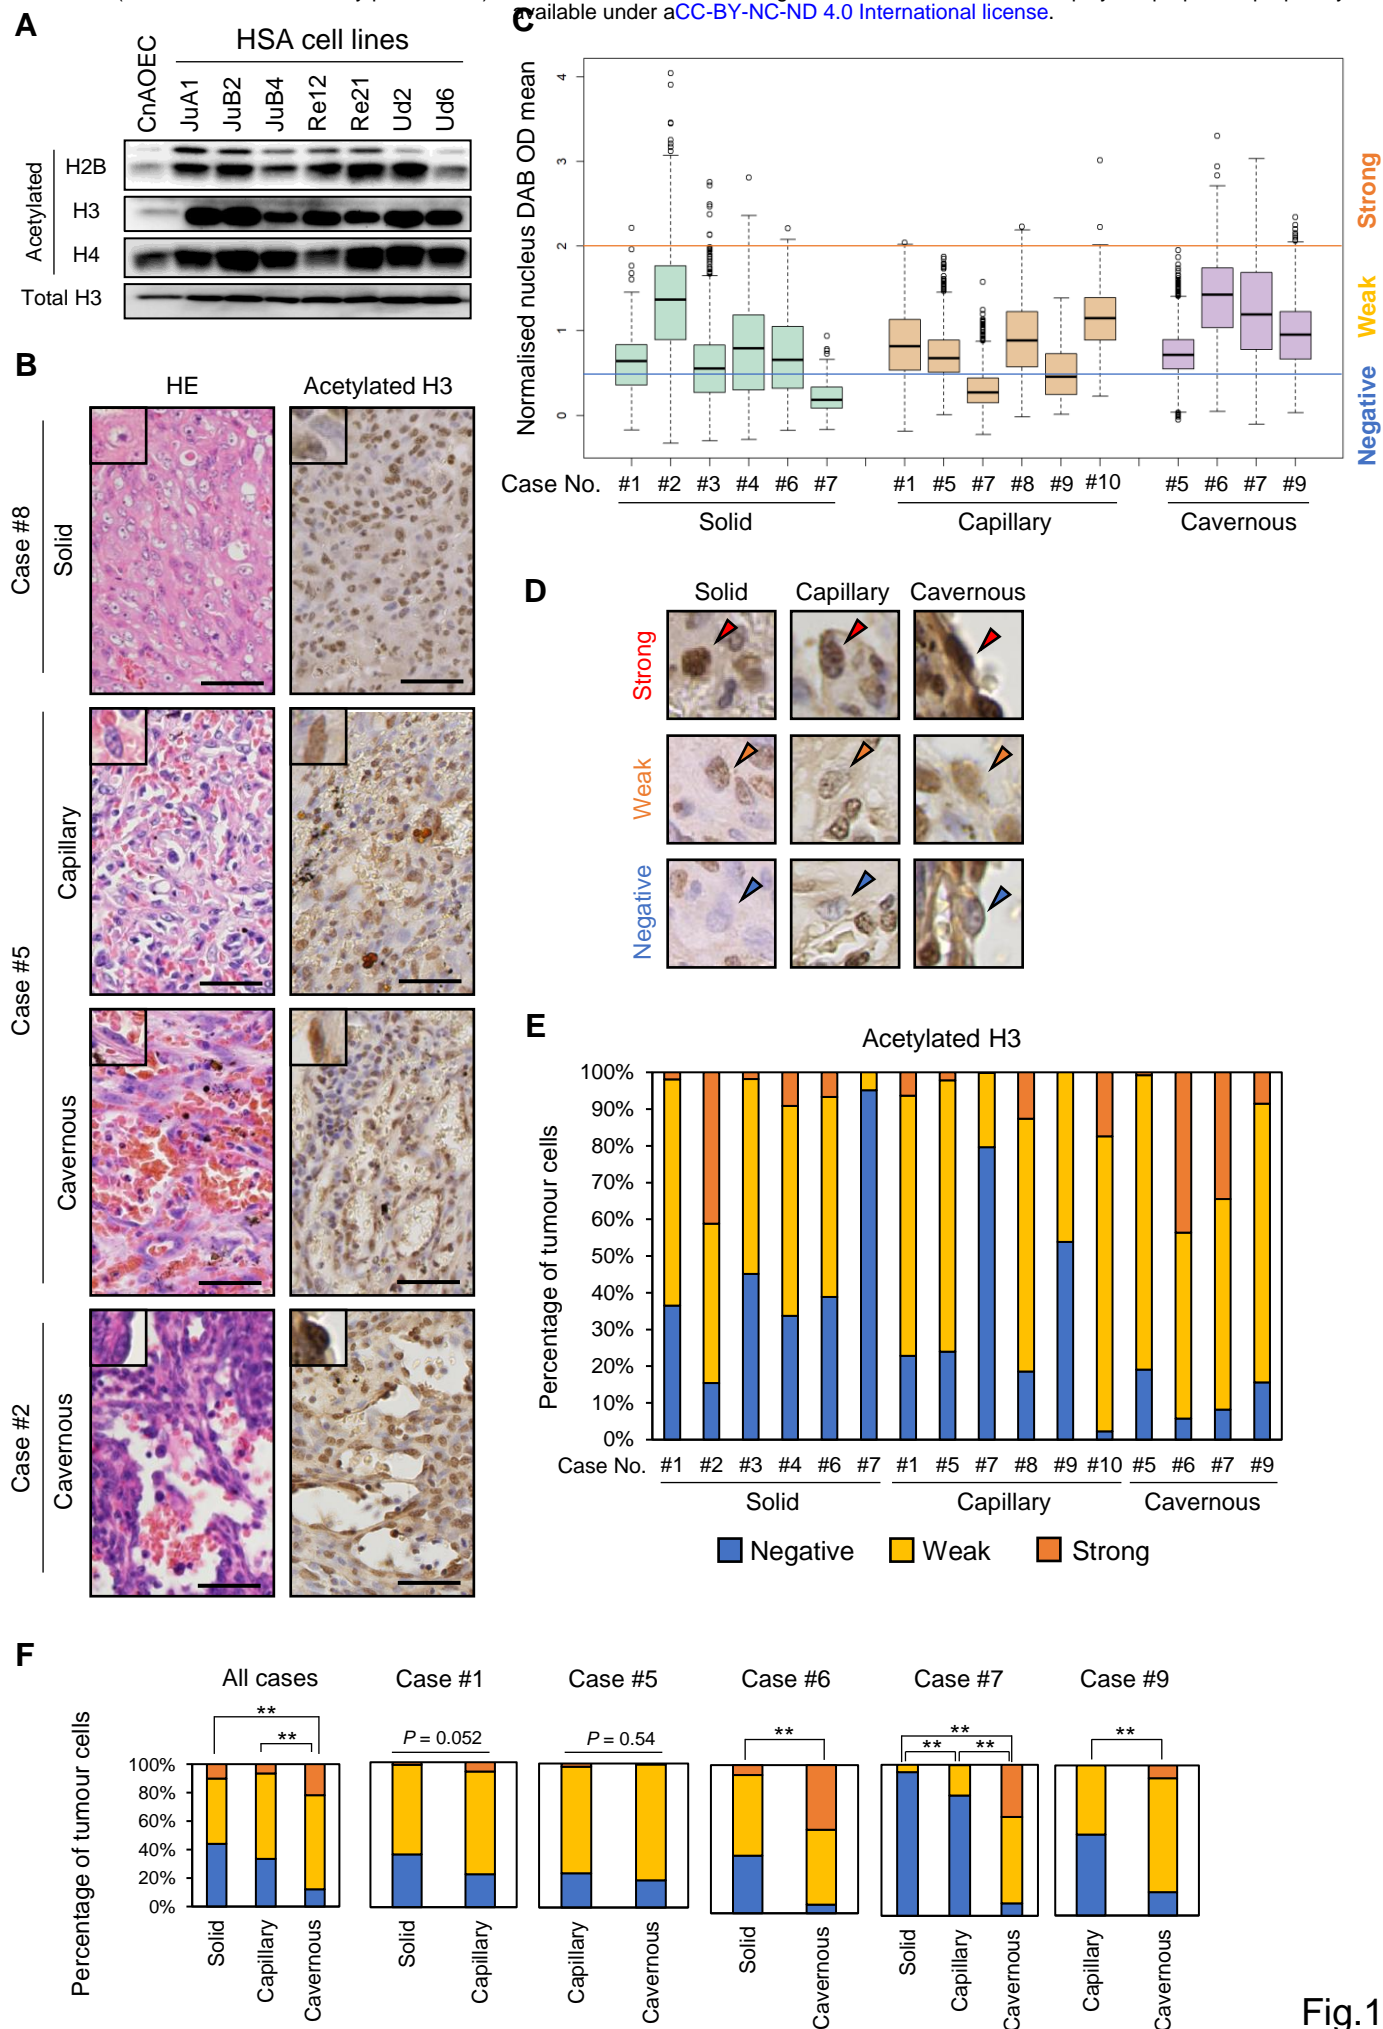

Fig.1

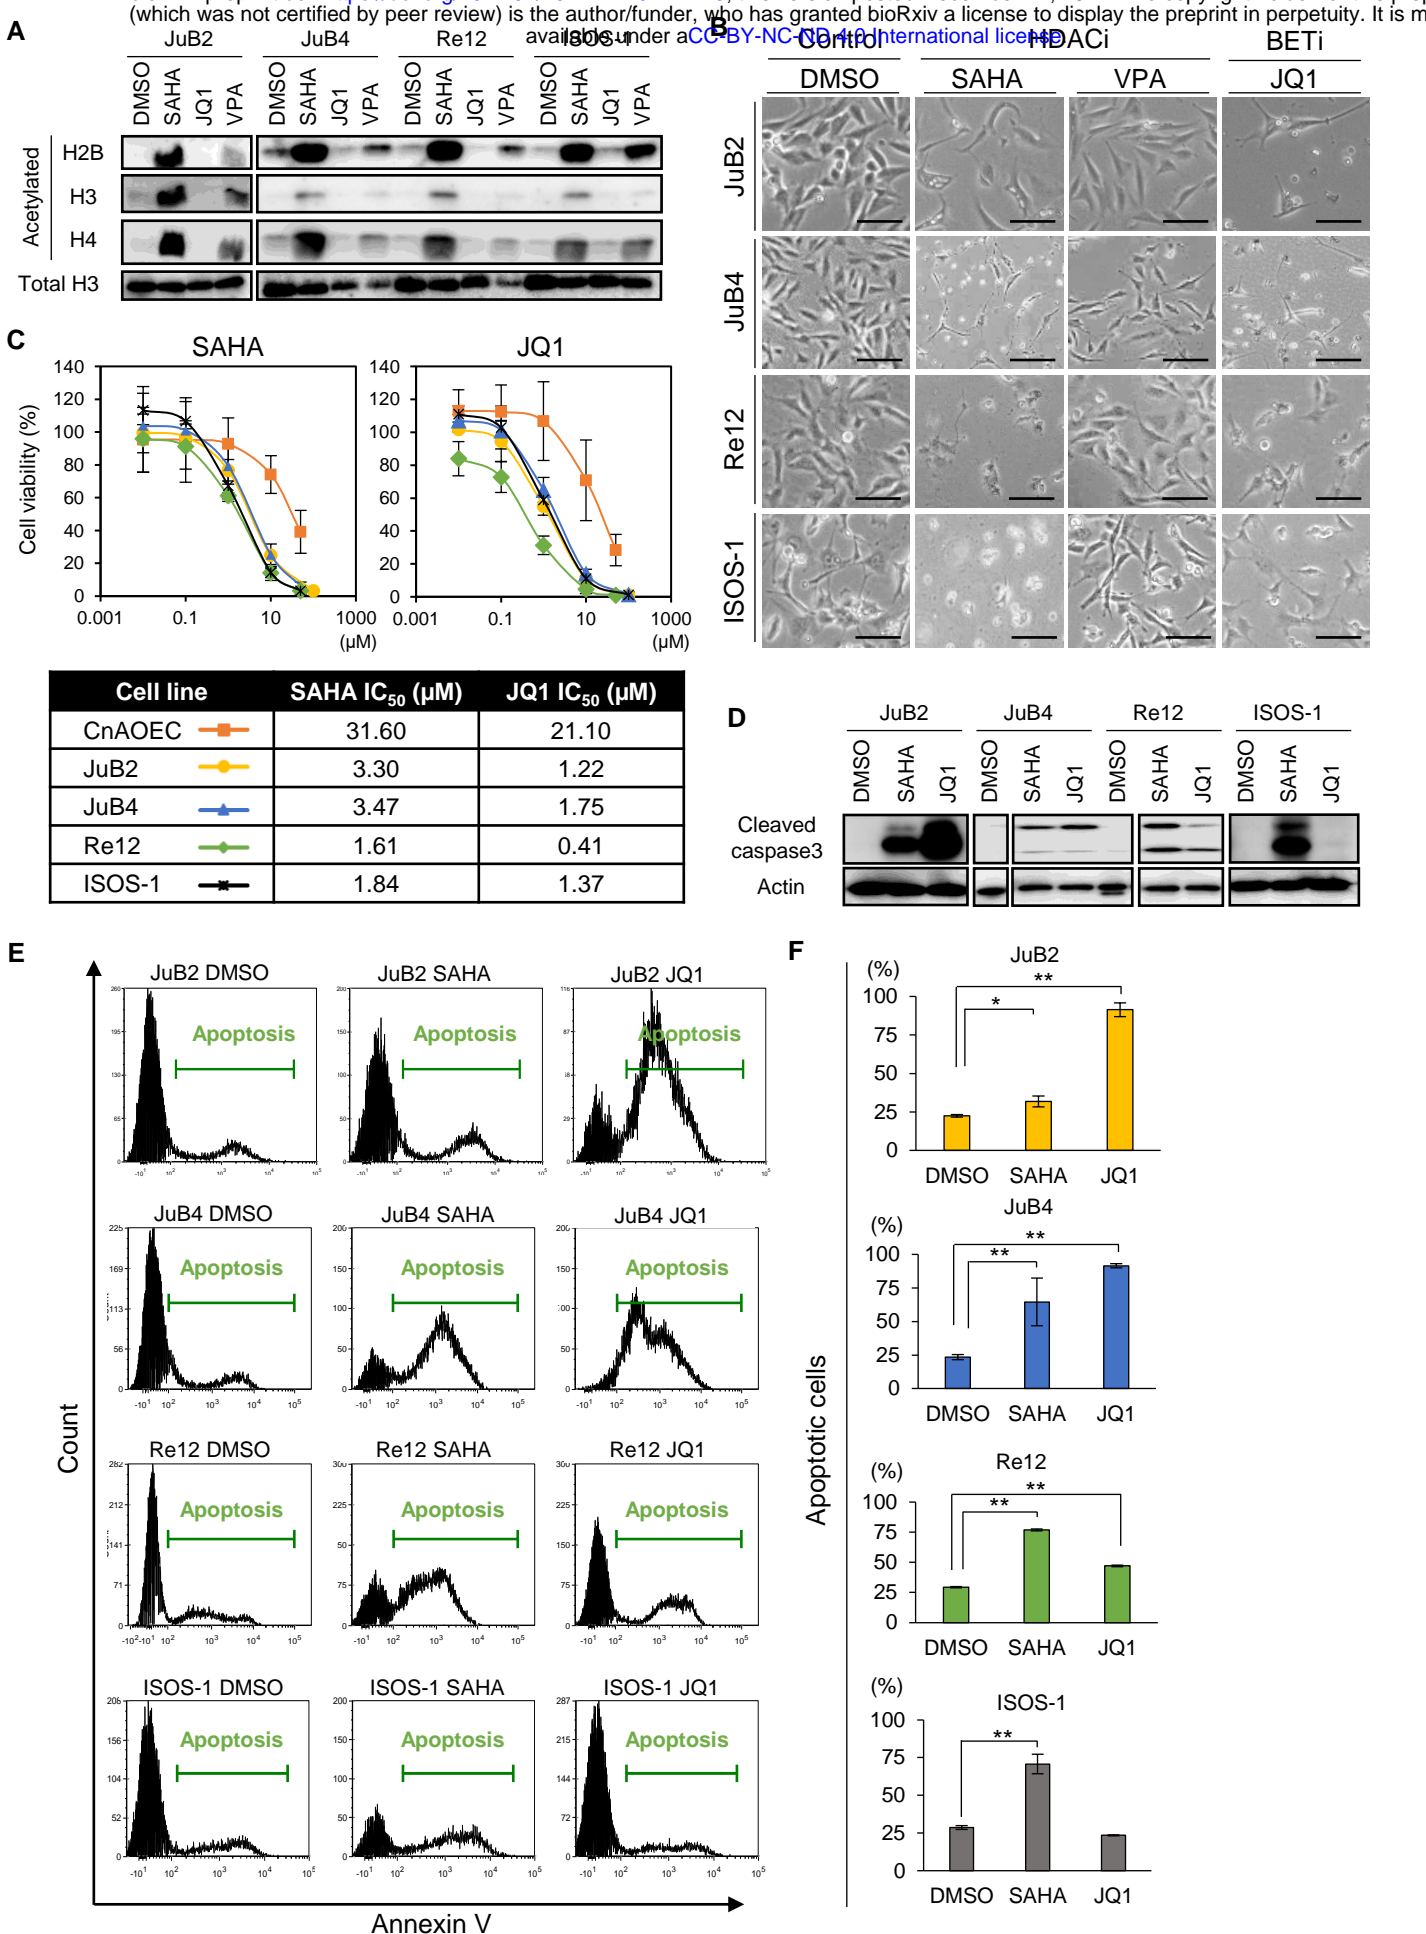

Fig.2



**A**

# ISOS-1 treated with SAHA

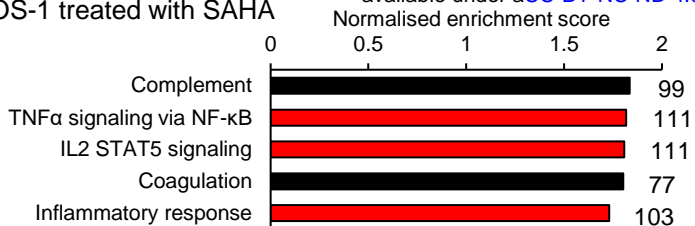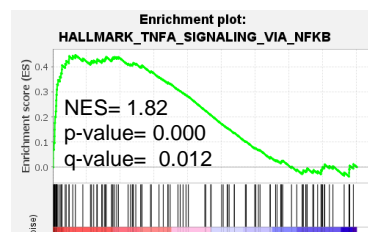

# ISOS-1 treated with VPA

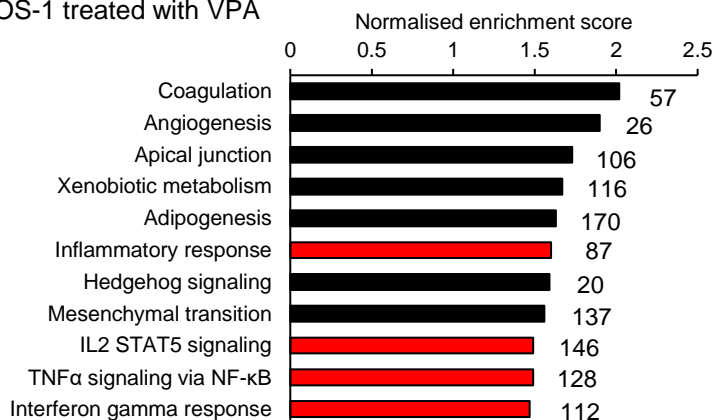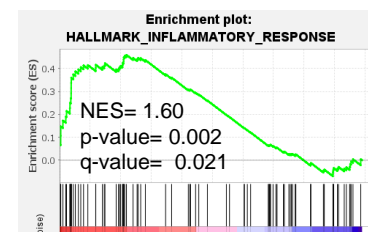

**B**

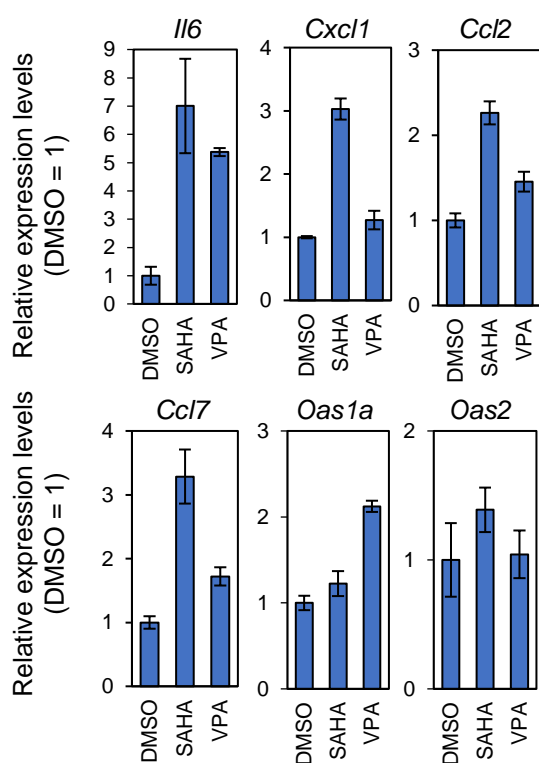

**C**

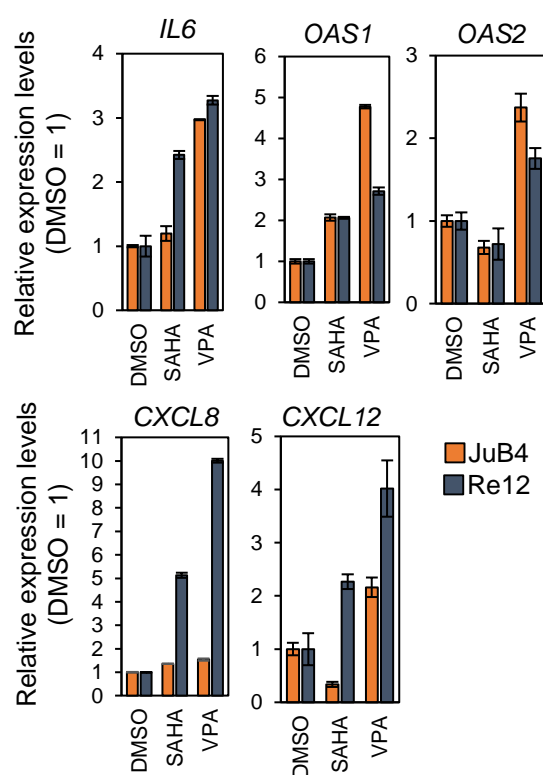

**D**

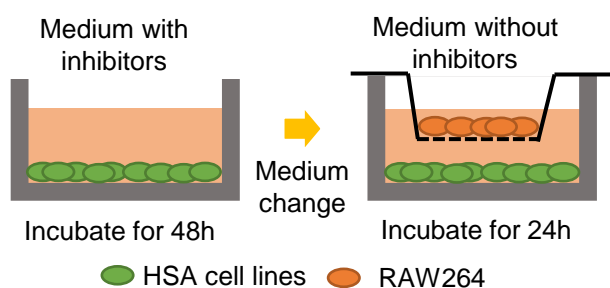

**E**

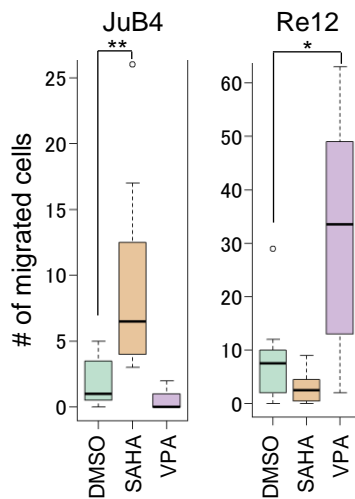

Fig.3

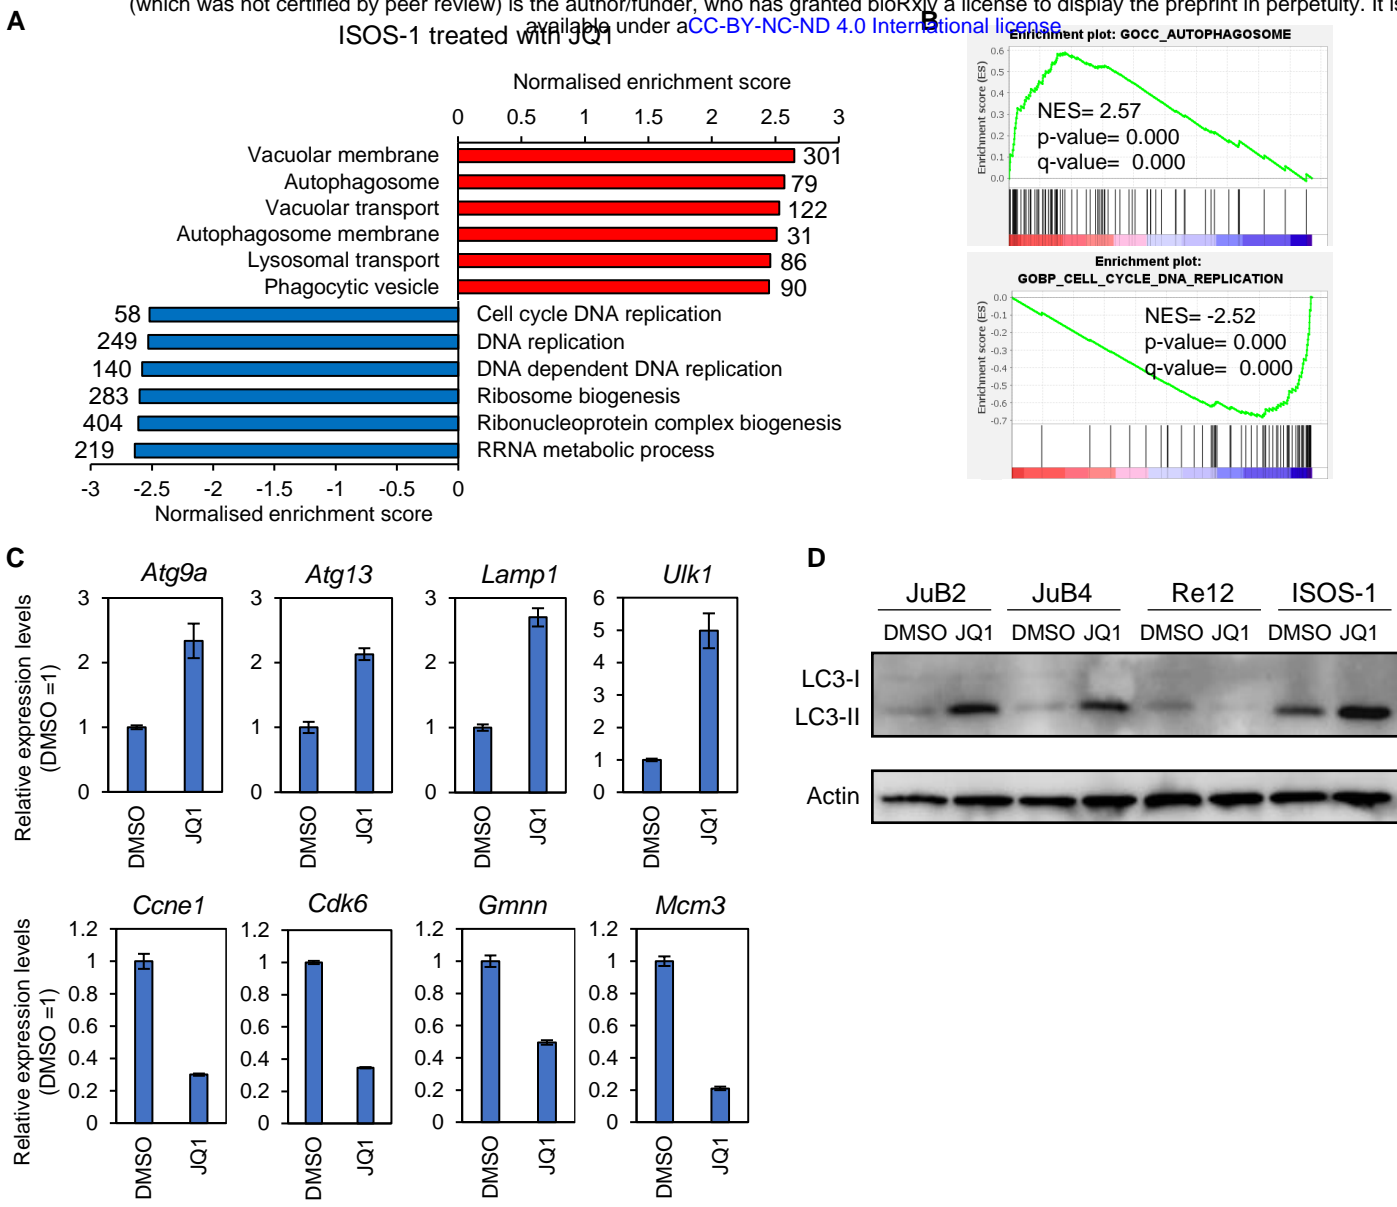

Fig.4

**A**

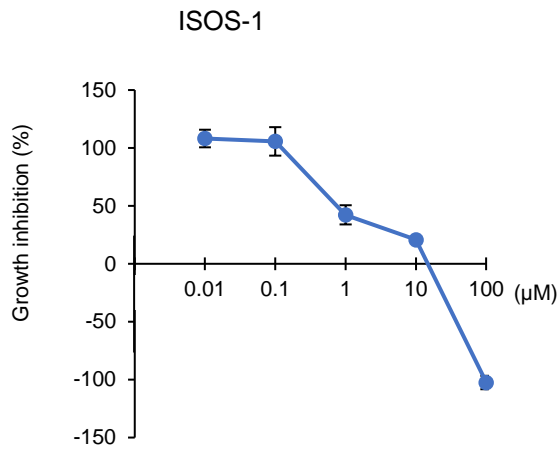

**B**

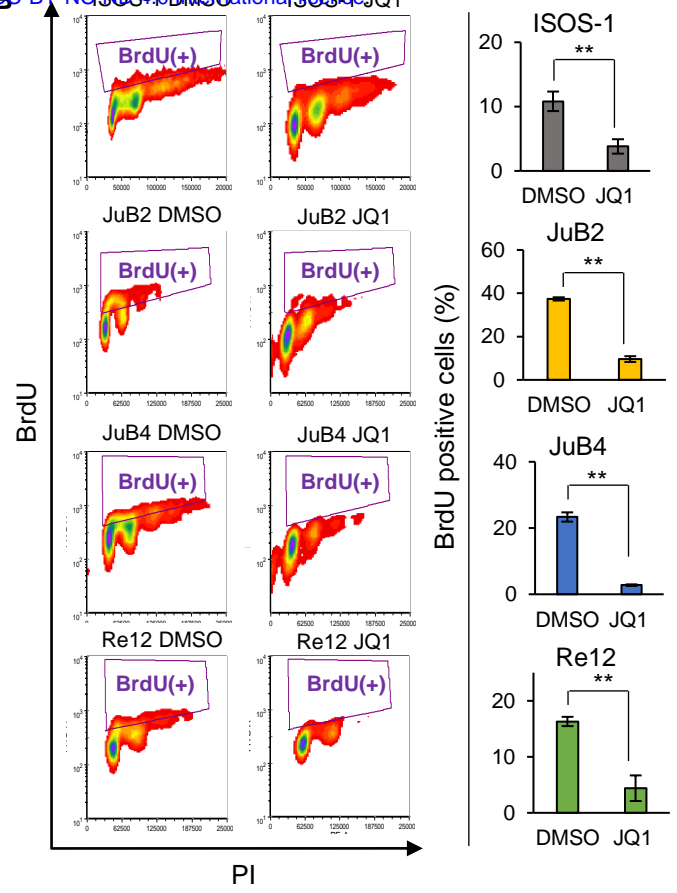

**C**

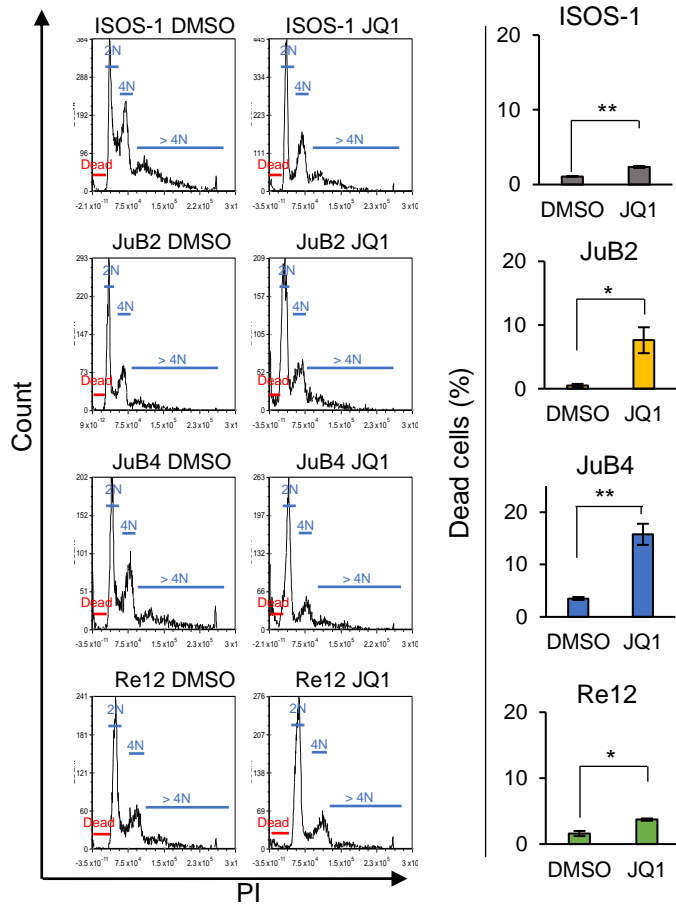

**D**

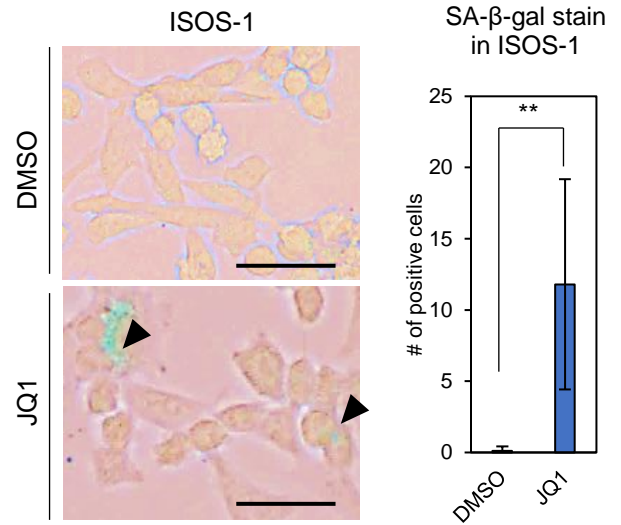

**Fig.5**

**A**

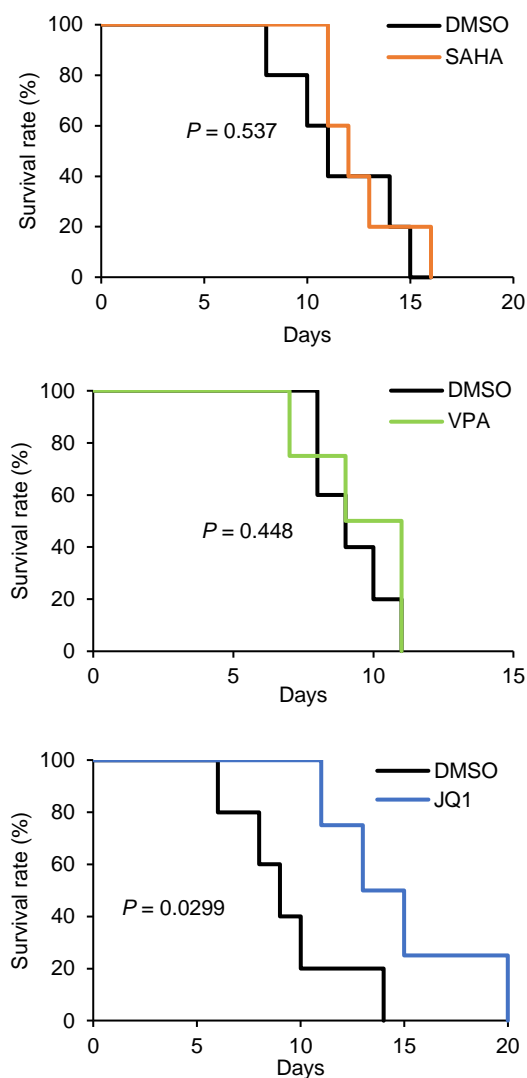

**B**

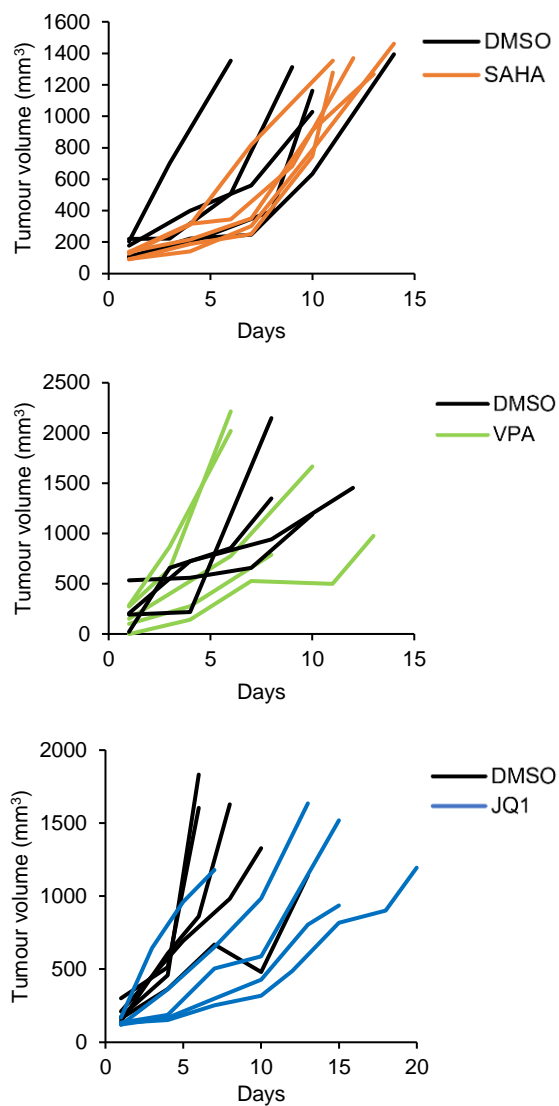

**C**

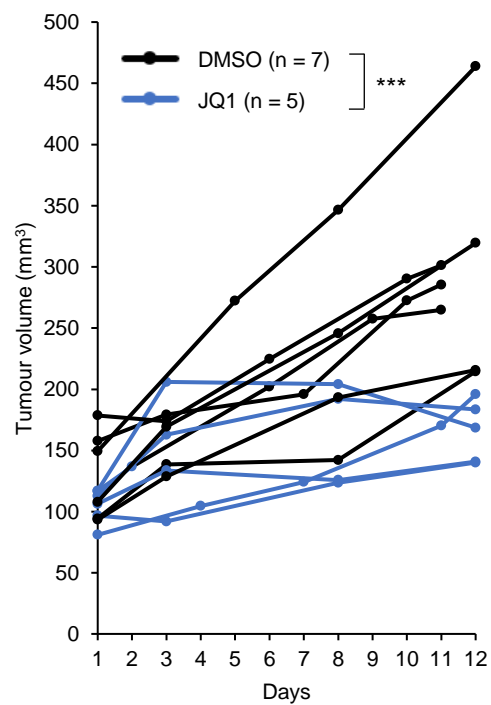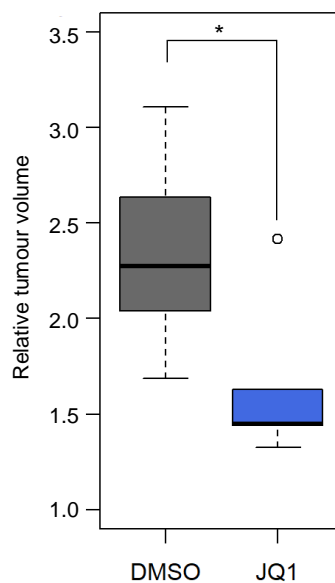

Fig.6
